# Supplementary material for: A Novel Noninvasive Technology for Real-Time Assessment of Critical Blood Values: A Pilot Clinical Study
Source: Preprints.org preprint supplement (doi:10.20944/preprints202302.0320.v1), 2023-02-20
Supplement: Supplementary file 1 [file supplementary]

**Figure S1:** Comfort level questionnaire for study participants (Adapted from: Knight, J.; Baber, C.; Schwirtz, A.; Bristow, H. The comfort assessment of wearable computers. In Proceedings of the IEEE Sixth International Symposium on Wearable Computers, White Plains, NY, USA, 21–23 October 2003; Volume 2, pp. 65–74).

Emotion Low/High

I am worried about how I look when I wear this device. I feel tense or on edge because I am wearing the device.


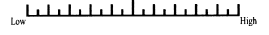


Attachment Low/High

I can feel the device on my body. I can feel the device moving.


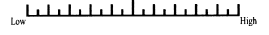


Harm Low/High

The device is causing me some harm. The device is painful to wear.


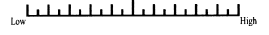


Perceived change Low/High

Wearing the device makes me feel physically different. I feel strange wearing the device.


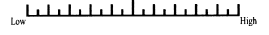


Movement Low/High

The device affects the way I move. The device inhibits or restricts my movement.


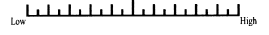


Anxiety Low/High

I do not feel secure wearing the device.


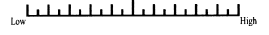


1. Can you tell me which device you preferred and why?
2. Is there anything else you want to provide about the DBC-NI device you would like to see?
